# Supplementary material for: Patient- and Caregiver-Reported Outcomes After Limb Salvage or Amputation for Pediatric Bone and Soft Tissue Sarcomas: A Scoping Review
Source: Research Square preprint supplement (doi:10.21203/rs.3.rs-8379832/v1), 2026-01-27
Supplement: Supplementary file 1 [file 3a24c115dd094d9a8a652394.xlsx]

## Sheet: Sheet3
	Article		Study Characteristics								Caregiver Characteristics										Patient/Survivor Characteristics										Patient/Caregiver Reported Outcomes
Article no.	Study ID #	Study Title	Journal	Study Country	Language	Dates Study Conducted	Study Design	Method	Funding Source	Sample size	Age	Sex/Gender	Race	Ethnicity	Income	Caregiver Type	Relationship status	Family make up	Ability Status	Other	Age at diagnosis/surgery	Sex/Gender	Race	Ethnicity	Diagnosis	Treatment Regime	Surgery Type	Surgery Location	Time since Surgery	Other Characteristics	Assessment Tool	Outcomes measured	Reported by caregivers (CG) or patients (P)?	Physical				Social and Occupational Functioning						Emotional Functioning
																																		General health	Pain	Mobility/Function	Independence (physical)	Recreational ability	Social/Relational	Financial	Educational/Occupational	Spiritual	Acceptance by Others	Self-image/Self-esteem	Mental Health	Satisfaction with Surgery	Cognition	Self-Efficacy	Other Outcomes
1	#574 – Bekkering 2010	Quality of life in young patients after bone tumor surgery around the knee joint and comparison with healthy controls.	Pediatric Blood Cancer	Netherlands	English		Cross- sectional, multi center	Mixed methods (interview and questionnaire)	This study was financially supported by grants from the Johanna Children Fund, Children Fund Adrian Foundation, and BIOChildren Rehabilitation Fund. Normative data SF 36 were obtained from the Division of Psycho-Social Research and Epidemiology (PSOE), The Netherlands Cancer Institute-Antoni van Leeuwenhoek Hospital, Amsterdam, The Netherlands	Total n=81. Children 8-15yo: n=33. Young adults: n=48.											Mean age at surgery: 10.5yo (SD=2.5). Mean age at evaluation: 12.7yo (SD=2.1)	Female: n=16, Male n= 17			Osteosarcoma: n=26 (79%). Ewing Sarcoma: n=7 (18%)		Limb Sparing n=12 (36%) -Allograft reconstruction: n=8 (24%) -Prosthesis: n=4 (12%) Ablative n=21 (64%) -Amputation: n=10 (30%) -Rotationplasty: n=11 (33%)	Lower extremity n=81 (around knee)	Mean 2.2 yrs (SD=1.4)		Children’s Quality of Life Questionnaire (TACQOL)	TACQOL	Patient Outcomes- Patient Reported			Body: Problems/limitations concerning general physical functioning Mean= 66.4 (SD=10.1) Overall, the areas of discontentment that were most frequently mentioned by patients included physical limitations (n=76, 95%) and sports (n=65, 80%). Motor: Problems/limitations concerning motor functioning Mean= 63.2 (SD=12.4)	Autonomy: Problems/limitations concerning independent/daily function Mean= 73.6 (SD=6.3) Children aged 8–15 years had significantly lower scores on the TACQOL domains motor functioning and autonomy than their healthy peers (P < 0.01)	Overall, the areas of discontentment that were most frequently mentioned by patients included physical limitations (n =76, 95%) and sports (n = 65, 80%).	Social: Problems/limitations with social contacts Mean= 74.9 (SD=7.4) Negative consequences of surgery concerning social were reported by 26 (32%) patients. Peer: Problems/limitations with peers Mean= 78.2 (SD=4.5)		Cognition: Problems/limitations concerning cognitive function and school performance Mean= 70.2 (SD=11.2)			Negative consequences of surgery concerning the cosmetic domains were reported by 31 (39%) of the patients.	Positive emotion Mean= 86.7 (SD=17.5) Negative emotion Mean= 73.7 (SD=20.8) Negative consequences of surgery concerning emotional domains were reported by 15 (19%) of the patients. In patients under 16 years of age, there were no significant differences between TACQOL scale scores of patients who underwent limb sparing or ablative surgery or between female and male patients. The only exception wa…	Cognition: Problems/limitations concerning cognitive function and school performance Mean= 70.2 (SD=11.2)
2	#6633 – Bekkering 2011	Functional ability and physical activity in children and young adults after limb-salvage or ablative surgery for lower extremity bone tumors	Journal of Surgical Oncology	Netherlands	English	2004 - 2008	Cross-sectional	Quanitative	Johanna Children Fund, Children Fund Adrian Foundation, BIO-Children Rehabilitation Fund	82											Age at surgery - Mean: 14.2 years (SD 4.1)	41 female, 41 male			Osteosarcoma (n = 67), Ewing's (n = 15)		-Limb salvage n = 39: Allograft (n = 24), Endoprosthesis (n = 15) -Ablative n=43 -Amputation n=27 -Rotationplasty n=16	Lower extremity n=82 (around knee)	Range 1 - 7 years		Toronto Extremity Salvage Score (TESS)	functional ability	Patient Outcomes- Patient Reported					Work Index All Patients: Mean= 2.40 (SD=0.59) Limb Salvage: Mean=2.47 (SD=0.63) Ablative: Mean=2.33 (SD=0.54) Sport Index All Patients: Mean=2.28 (SD=0.68) Limb Salvage: Mean=2.26 (SD=0.71) Ablative: Mean=2.30 (SD=0.67) Leisure Time Index All Patients: Mean=2.66 (SD=0.78) Limb Salvage: Mean=2.76 (SD=0.81) Ablative: Mean=2.57 (SD=0.75) Total Activity Index All Patients: Mean=7.4 (SD=1.32) Limb Sal…
3	#8621 – Cooper 2020	Pediatric Sarcoma Patients with Worse Physical Function but Better Peer Relationships and Depressive Symptoms than U.S. Pediatric Population as Measured by PROMIS R.	Cureus: Journal of Medical Science	USA	English	Sept 2016- March 2017	Cross sectional	Quanitative		Total n=30. Those with surgery n=20. **Demographic stats recorded for patient characteristics are for that of the entire cohort as study does not seperate surgery vs no surgery											Mean= 12.97 (SD=2.77)	Female n=16, Male n=14			Bone Sarcoma -Osteosarcoma: n=17 -Ewing Sarcoma: n=7 -Chondrosarcoma: n=1 Soft Tissue Sarcoma: n=5	Adjuvant (chemo and/or radiation) n=26	Limb salvage resection n=24. Prior incomplete resection n=3.		Follow up for surgical candidates:Mean 1.64 yrs (SD=1.61)		Patient-reported Outcomes Measurement Information System (PROMIS) Short Form v1.0	Patient Reported Outcomes: Physical Function Mobility, Peer Relationships, Pain Interference, Fatigue, Depressive Symptoms, Anxiety	Patient Outcomes- Patient Reported	Patients surveyed postoperatively had a mean T-score of 48.7 (SD 12.9). None of these statistically differed from the overall mean T-score of 52.5 (13.3).	The only measure that trended toward a difference between surgical status groups was pain interference (p=0.072). Unsurprisingly, this measure was higher in preoperative patients (mean 59.0, SD 10.6). It was even higher in those managed without surgery (mean 63.0) but with a wide standard deviation (13.8).	Patients who were surveyed preoperatively had a mean physical function T-score of 36.4 (SD 14.1), while those treated without surgery had a T-score of 40.7 (SD 16.3), and those who were treated with surgery had a T-score of 40.6 (SD 7.1); these did not differ from the overall mean of 39.5 (SD 9.8).			Mean T-score for peer relationships with 54.27, SD = 8.82 Noted that this was affected by ceiling effect as 8 participants scored the highest possible score on this questionnaire						Study cohort had low T-scores for depressive symptoms (mean = 42.03, SD 9.07). This measure had the highest flooring rate with 13 patients scoring the lowest possible score. Anxiety: mean T-score = 46.27, SD = 12.70 with high flooring effects of 8 patients			Pain interference (consequences of pain on relevant aspects of one's life) had a high flooring effect (n = 7) and one patient who scored the highest possible score on this measure
4	#902 – Eiser 1997	Quality of life in children following treatment for a malignant primary bone tumour around the knee.	Sarcoma	United Kingdom	English		Cross sectional	Mixed methods (interview and questionnaire)	This work was funded by the Cancer Research Campaign (CP1019/0101).	n=41											Not Interviewed Cohort Age at diagnosis: Mean= 10.9yrs (Range 7-15yo) Chronological age: Mean=17.7yrs (Range 8-25yo) Time since diagnosis: Mean= 6.8 yrs (Range 2-13yrs) Interviewed Cohort Age at diagosis: Mean= 10.8 yrs (Range: 5-14yo) Chronological age: Mean=18.6yrs (Range: 9-28yo) Time since diagnosis: Mean=7.8 yrs (Range: 2-5) Overall Group Current age: Mean=18 yo (Range: 8-28yo)	Female: n=17 Male n=24			Malignant Primary Bone Tumor. Of these, Ewing Sarcoma n=5		Extensible Endoproesthetic Prosthesis: n=35 Non Extensible Prosthesis n=9	Lower extremity n=41 (around knee)			36-Item Short Form Survey (SF-36)	Quality of Life	Patient Outcomes- Patient Reported (Over 18yo)	Mean=67.6	Mean= 65.37	Mean= 67.2	Role performance Mean= 75.8	Bike Unable 22% Some difficulty 32% No difficulty 46% Swim Unable 7% Some difficulty 34% No difficulty 49% Drive Too young 42% Unable 5% Some difficulty 2% No difficulty 51% None of the sample reported that they took part in contact sports at least at any competitive level. Participation in all sports was generally very low, with patients commenting that although they were allowed to play non-con…	Social: Mean= 74.2		EMPLOYMENT Twenty-six (63%) were still in full-time education. Among the rest, three (7%) were unemployed, 11 (27%) were in full-time employment and one was a housewife and mother. Four reported that their work was too demanding for them and six thought it was `sometimes’. One female was wanting to give up her clerical post in order to return to full-time education. All patients were asked whethe…			Seven (two males and five females) of the sample were distressed by their scar. The remainder were not embarrassed or at all self-conscious of the scar, and six (four males and two females) reported themselves quite proud (`I wear it like a medal’). Much more distress was experienced in relation to muscle wasting, uneven growth and mis-shapen knees (n=5). Many continued to feel embarrassed by the…	Emotional: Mean=79.3. Mental Health=70.6.		Patients were not directly asked whether or not they understood that there was a risk they might have been treated by amputation. However, 23 raised the question of amputation themselves. None felt they had been offered a choice in treatment, rather that prosthesis was the preferred policy of the hospital. All were pleased they had had a prosthesis rather than an amputation. One reported having s…		Vitality: Mean= 59.6
5	#6532 – Forni 2012	Living with rotationplasty Quality of Life in rotationplasty patients from childhood to adulthood	Journal of Surgical Oncology	Italy	English		Descriptive quali-quanitative study	Mixed methods (interview and questionnaire)	None	Total: n=20. Questionnaires: n=20. Interviews n=10											Current Age: Mean=26.9 yrs (SD=5.3)	Female: n=8, Male n=12					Rotationplasty n=20	Lower limb n=20	Mean=17.2 yrs (SD=4.0, Range: 6.7-22.4yrs)		36-Item Short Form Survey (SF-36)	Quality of Life	Patient Outcomes- Patient Reported	General Health: Mean=83.6 (SD=12.4)	Pain: Mean=88.2 (SD=19.7)	Physical Functioning: Mean=89.3 (SD=8.8)	Role-Physical: Mean= 81.3 (SD=30.2)		Social Functioning: Mean=81.2 (SD=20.5)					Experience of maturation (‘‘Perhaps it made me grow up earlier’’). Recurrent experience in accepting oneself, even with the limits imposed by the disability, is one of growth and maturation that follows the unawareness of childhood: ‘‘Because first as a child I was carefree’’, ‘‘At first I thought of it as a common cold’’, ‘‘Then obviously life makes you grow up’’, ‘‘It made me a lot stronger’’, …	Mental Health: Mean=80.8 (SD=12.0)		Better rotationplasty (‘‘Between this and bits of plastic that move on their own...’’). The latter category derives from a specific question. Eight interviewees answered positively to the choice of rotationplasty because of functional performance ‘‘Undoubtedly a lot better in my experience compared with amputation with a stump that I have seen in other kids...’’, ‘‘I would always choose this’’, ‘…		Vitality: Mean =71.8 (SD=13.7). Role- Emotional: Mean=83.3 (SD=22.4). Mental Component Summary: Mean=52.4 (SD=6.0)
6	#688 – Ginsberg 2007	A comparative analysis of functional outcomes in adolescents and young adults with lower-extremity bone sarcoma.	Pediatric Blood Cancer	USA	English		prospective multi-site study	questionnaires	American Lebanese Syrian Associated Charities (ALSAC) and facilities of St. Jude Children's Research Hospital and The Children's Hospital of Philadelphia	N = 91											Mean age at surgery 14.52 years (SD = 4.06)	Female = 43 Male = 48			Ewing Sarcoma = 14 Osteosarcoma = 77		Amputation = 22 (AKA = 18, BKA = 4) Limb sparing = 65 Rotationplasty = 4	Lower extremity n=91	From amputation: mean = 9.59 years (SD = 6.43) From limb-sparing: mean = 4.29 years (SD = 2.98)		TESS	Functional outcomes	Patient reported - patient outcomes	Mean SF36 Total Score: AKA = 71.7 ± 18.5 BKA = 86.6 ± 12.2 Limb sparing femur = 75.5 ± 16.8 Limb sparing tibia = 76.4 ± 15.5 Rotationplasty = 82.1 ± 4.4 Patients with a BKA had TESS and SF36 PCS scores higher than that of the AKA group Patients with a BKA scored higher on the SF36 PCS than the limb sparing tibia group Patients with a rotationplasty had significantly higher TESS scores than patien…		Mean TESS scores: AKA = 84.8±10.8 BKA = 94.5 ± 5.1 Limb=sparing femur = 86.4 ± 9.9 Limb sparing tibia = 88.1 ± 9.3 Rotationplasty = 95.6 ± 2.8 Mean SF36 PCS Score: AKA = 46.9 ± 8.1 BKA = 56.0 ± 2.5 Limb sparing femur = 47.6 ± 8.2 Limb sparing tibia = 49.9 ± 7.2 Rotationplasty = 52.7 ± 4.0									Mean SF36 MH score: AKA = 49.5 ± 12.8 BKA = 52.9 ± 9.3 Limb sparing femur = 52.3 ± 8.8 Limb sparing tibia = 51.9 ± 9.1 Rotationplasty = 52.0 ± 3.8
7	#6486 – Han 2012	Study on the health-related quality of life in patients after surgery for malignant bone tumors	Asian Pacific Journal of Cancer Prevention	China	English		Cross sectional	Quanitative		n=120					<5000 RMB n=66, > or = to 5000 n=54						Age at surgery: Mean= 14.1 yrs (SD=4.6)	Female n=41, Male n=79			Osteosarcoma n=94, Ewing sarcoma n=26		Limb salvage n=52, Ablative surgery n=68	Lower extremity: Distal femur n=85 Proximal tibia n=35	Surgery performed June 2008 - June 2010, follow-up after surgery at 6 months and 12 months later		36-Item Short Form Survey (SF-36)	Health related quality of life	Patient Outcomes- Patient Reported	Before surgery: Mean=44.2 (95% CI=37.5-57.5). 6 months after surgery: Mean=47.5 (95% CI=31.1-59.5). 12 months after surgery: Mean=48.2 (95% CI=31.2-61.8).	Before surgery: Mean=24.5 (95% CI=18.1-31.4). 6 months after surgery: Mean=30.4 (95% CI=25.3-47.5). 12 months after surgery: Mean=40.5 (95% CI=30.4-55.5).	Before surgery: Mean=32.6 (95% CI=21.5-38.7). 6 months after surgery: Mean=36.2 (95% CI=22.7-54.3). 12 months after surgery: Mean=46.2 (95% CI=28.6-65.2).	Role-Physical. Before surgery: Mean=21.4 (95% CI=16.7-28.3). 6 months after surgery: Mean=32.1 (95% CI22.3-43.5). 12 months after surgery: Mean=43.5 (95% CI=31.6-58.9).		Social Functioning Before surgery: Mean=51.6 (95% CI=40.5-61.3). 6 months after surgery: Mean=77.6 (95% CI=67.7-86.7). 12 months after surgery: Mean=79.5 (95% CI=68.8-85.7)						Mental Health Before surgery: Mean=61.5 (95% CI=52.3-68.5). 6 months after surgery: Mean=78.7 (95% CI=70.1-89.3). 12 months after surgery: Mean=81.7 (95% CI=70.2-90.3).				Vitality. Before surgery: Mean=41.5 (95% CI=36.7-53.9). 6 months after surgery: Mean=74.5 (95% CI=61.1-84.6). 12 months after surgery: Mean=72.7 (95% CI=60.3-73.2) Role Emotional. Before surgery: Mean=53.2 (95% CI=44.6-69.2). 6 months after surgery: Mean=86.5 (95% CI=70.5-92.4). 12 months after surgery: Mean=84.2 (95% CI=72.2-93.6) Physical Component Before surgery: Mean=29.8 (95% CI=17.7-43.9). …
8	#537 – Henderson 2010	What is the Emotional Acceptance After Limb Salvage with an Expandable Prosthesis?	Clinical Orthapedics and Related Research	USA	English		Retrospective Descriptive	Quanitative		n=15						Parents					Range: 6-15 yrs old (Mean=10.5)	Female n=7, Male n=8			Primary bone sarcoma n=15		Limb salvage	Lower extremity n=15	mean, 63 months; range, 8–155 months		Pediatric Outcomes Data Collection Instrument (PODCI)	Global Patient Functioning	Patient Outcomes- Caregiver Reported						Rarely associates with other children, n=1 Occasional activities with other children n=1 Frequent social interactions n=9 Making friends described as: ‘Somewhat easy’ n=2 ‘Usually easy’ n=9					Response to question on body perception: ‘Somewhat unhappy' n=1 ‘Unsure’ n=1 ‘Somewhat happy,' n=3 ‘Very happy' n=8 Response to question on satisfaction with physical appearance: “Somewhat unhappy” n=1 “Somewhat happy” n=2 “Very happy” n=8 One parent reported "her daughter expressed occasional frustration with inquiries about her scar when wearing a bathing suit or shorts".	mean score for happiness domain: 87.3 (SD, 16.7; 95% CI, ± 9.1)		‘Very high w prosthesis’ n=10 ‘Somewhat satisfied prosthesis’ n=1 The parent and child who reported being ‘‘somewhat satisfied’’ with the surgical outcome were within the same family that reported social interaction as occurring rarely or never.
9	#459 – Henderson 2012	Outcome of lower-limb preservation with an expandable endoprosthesis after bone tumor resection in children.	The Journal of Bone and Joint Surgery	USA	English		Retrospective review	Quantitative	none to declare	N = 38											Mean age 10.4 years (4-15 years) at time of surgery	Female n=19 girls, Male n=19			Osteosarcoma n= 31, Ewing sarcoma n= 7	Neoadjuvant and adjuvant therapy n=38		Lower extremity n=38	Mean follow up duration = 48 months (23-146 months)		Pediatric Outcomes Data Collection Instrument (PODCI)	Physical function and emotional acceptance	Patient Outcomes- Patient and Parent Reported		Mean pain and comfort scores (Range): Biomet: 72.7 (41 - 100) Stryker: 86.5 (71 - 100) Stanmore: 73.9 (45 - 94.5) All: 77.0 (41-100)	Mean transfer and basic mobility score (Range): Biomet: 97.5 (94 - 100) Stryker: 96.5 (92 - 100) Stanmore: 94.6 (87 - 100) All: 95.7 (87-100) Mean upper extremity function score (Range): Biomet: 100 (100) Stryker: 100 (100) Stanmore: 98.0 (90-100) All: 98.9 (90-100)		Mean score for sports and physical function (Range): Biomet: 59.7 (48-82) Stryker: 65.5 (59-72) Stannmore: 76.2 (53-97) All: 70.1 (48-97) The mean score for the sports and physical function domain was the lowest for any PODCI domain							Mean happiness score (Range): Biomet: 92.5 (85 - 100) Stryker: 86.9 (90 - 100) Stanmore: 89.7 (55 - 100) All: 89.5 (55-100)		The emotional acceptance and happiness scores reported by patients in the present study demonstrated high overall patient satisfaction with the outcome. There was no correlation between the occurrence of complications and emotional satisfaction.		Mean PODCI global score (Range): Biomet: 82.5 (71-89.5) Stryker: 88.6 (85.5-95.5) Stannmore: 85.6 (75.5-98) All: 85.8 (71-98) Mean MSTS emotional acceptance score (SD): Biomet: 5.0 (0.0) Stryker: 4.5 (0.5) Stanmore: 4.6 (0.5) All: 4.6 (0.5) Mean MSTS global score (SD): Biomet: 25.0 (1.0) Stryker: 26.5 (2.6) Stanmore: 26.3 (1.8) All: 26.1 (2.0)
10	#1880 – Hopyan 2006	Function and upright time following limb salvage, amputation, and rotationplasty for pediatric sarcoma of bone	Journal of Pediatric Orthopedics	Australia	English	Published 2006	Retrospective cohort study	Quanitative	Australian Orthopedic Association	n = 45 (n=20 participants did not meet age requirments for our study)											Female: n=23 Limb salvage n = 8 AKA n = 10 Rotationplasty n = 5 BKA n=0 Male: n=22 Limb salvage n = 12 AKA n = 9 Rotationplasty n = 0 BKA n = 1	Female: n=23 Limb salvage (n = 8) AKA (n = 10) Rotationplasty (n = 5) Male: n=22 Limb salvage (n = 12) AKA (n = 9) Rotationplasty (n = 0) BKA (n = 1)			Lower extremity osteosarcoma and Ewing sarcoma		limb salvage n = 20, above-knee amputation (AKA) n = 19, rotationplasty n = 5, below-knee amputation (BKA) n = 1	Above knee and lower extremity n=45			SF-36	General health (with physical and mental health summary scores)	Patient Outcomes- Patient and Parent Reported			AKA: Mean= 47.2 (SD=6.1, Range= 33.5 - 56.9) Rotationplasty: Mean= 53.6 (SD=3.7, Range= 50.0 - 56.7) BKA: Score=53.7									AKA: Mean=51.6 (SD=9.8, Range=23.6 - 62.5) Rotationplasty: Mean=56.9 (SD=2.5, Range= 54.2 - 59.4) BKA: Score= 54.3				MSTS was clinician reported but scores are as follows: AKA: Mean= 60.2 (SD= 9.8, Range= 33.3 - 76.7) Rotationplasty: Mean= 67.3 (SD= 6.8, Range= 50.0 - 56.7) BKA: Score= 70.0
11	#5181 – Jamshidi 2019	Curettage, phenolization, and cementation in paediatric Ewing's sarcoma with a complete radiological response to neoadjuvant chemotherapy	International Orthopaedics	Iran	English		Case Control	Quanitative		n=43											Current age. Entire sample: Mean= 6.5yrs (SD=2.9). Curettage Group: Mean=6.78yrs (SD=2.7). Wide Resection Group: Mean=6.1yes (SD=3).	Entire Cohort: Female n=24, Male n=19. Curettage Group: Female n=15, Male n=11. Wide Resection Group: Female n=9, Male n=8			Ewings Sarcoma n=43		Curettage n=26, Wide Resection n=17.	Lower and upper extremities: Femur (13 cases, 7 controls), tibia (6 cases, 4 controls), humerus (5 cases, 3 controls), radius (2 cases, 4 controls)	Entire Group: Mean 6.5yrs (SD=2.9). Curettage Group: Mean=60.8 months (SD=35). Wide Resection: Mean=56.2 months (SD=28).	Recurrence: Total Group n=5 Curettage n=3 Wide Resection n=2 Metastasis Total Group n=5 Curettage n=3 Wide Resection n=2	Musculoskeletal Tumor Society (MSTS)	Function	Patient Outcomes- Caregiver Reported			Curettage: Mean= 98.3% (90-100%). Wide Resection: Mean=74% (60-90%)
12	#380 – Jaraway 2013	Preparing Parents to Help Support Their Child Post-Amputation for Bone Cancer	Operating Room Nurses Association of Canada (ORNAC)	Canada	English	September 2009 - May 2010	Retrospective exploratory descriptive study	Mixed methods (interview and questionnaire)	ORNAC	N = 45; 22 parents, 13 patients		13 mothers, 9 fathers				parents		9 families where both parents participated, 4 only mom			6 - 16 years old at time of surgery; Mean time since surgery: 11.31 yrs (SD=3.376)	Male n=3 Female n=10			Bone cancer (doesn't specify which kind)		Van Ness (n = 11) Winkleman (n = 2)	Lower extremity n=13	Age at time of study was 8 - 25 years, roughly 3 - 14 years from surgery; Mean Age at interview: 16.82 (SD=4.916)		5-scale Likert	Experience of caregivers went to OR during surgery vs those who did not	Caregiver Outcomes- Caregiver Reported										Parents who went into the OR said they felt better prepared for the amputation because they seen their child's leg: Mean = 5.0 (SD = 0.0)		In Operating Room: Felt glad they say their childs leg before they woke up (mean 5, SD 0.0). Not in OR: I wish I could have gone in to see my child's amputated leg before they woke in the OR: Mean =2.60 (SD=0.548, Range 2-3)		All parents who did not go into the OR said that the amputation looked better than they expected (mean 2, SD 0.0); In the OR: the leg looked better than what I expected: Mean =4.25 (SD=1.065, Range: 2-5)	Parents who went into the OR reported that they felt their ability to help their child after surgery was better because they saw the amputation (mean 4.94, 4-5 range) Not in the OR: I believe that my ability to help my child after surgery would have been better if I had already seen the leg in the OR: Mean =1.83 (SD=0.408, Range= 1-2).	Interview Data: Parents Who Went In OR All 16 parents felt that they were given sufficient information to enable them to make the decision to go to the OR. All of the parents (100%) found the experience of going into the OR to be highly positive. Parents Who Did Not Go in OR Of the six parents who did not go into the OR all said that they were not offered that option. None of them, however, regre…
13	#27 – Meng 2022	A longitudinal evaluation on 3-year change of anxiety and depression, and their risk factors among parents of childhood and adolescence patients with resectable osteosarcoma: A cohort study	Medicine	China	English		Observation Cohort Study, Longitudinal	Quanitative		104 parents, 56 patients	Mean= 41.6yrs (SD=5.3)	Female n= 55 (52.9%), Male n= 49 (47.1%)			<10000CNY n= 2 (1.9%); 10000-29999CNY n= 26 (25.1%); 30000-49999CNY n=38 (36.5%); >50000CNY n=38 (36.5%)	Mother n= 55 (52.9%), Father n= 49 (47.1%)	Married n=96 (92.3%) Divorced/Widowed: n= 8 (7.7%)			Employment Status Before Surgery Employed n=88 (84.6%) Unemployed n=16 (15.4%) Level of Education Primary school or less: n=6 (5.8%) High school: n=45 (43.3%) Undergraduate: n=43 (41.3%) Graduate or above: n=10 (9.6%) Location Urban: n=90 (86.5%) Rural: n=14 (13.5%)	Mean age at surgery: 12.0 yrs (SD= 3.2)	Females: n=19 (33.9%), Males n=37 (66.1%)			Osteosarcoma: n=56 Who Classification of Sarcoma Conventional Chondroblastic: n=9 (16%) Conventional Osteoblastic: n=38 (67.9%) Conventional Other: n=7 (12.5%) Telangiectatic: n=2 (3.6%)		Limb salvage: n= 38 (67.9%); Amputation: n= 18 (32.1%)	Tumor Location Femur: n= 30 (53.6%) Tibia: n=22 (39.3%) Others: n=4 (7.1%)	Parents were followed up at 0.5 year, 1 year, 2 years, and 3 years after discharge with a visit window period of 1 month	Pathological Fracture No: n=42 (75%) Yes: n=14 (25%) Enneking Stage Stage I: n=7 (12.5%) Stage IIA: n=14 (25%) Stage IIB: n=35 (62.5%)	Hospital Anxiety and Depression Scale-Anxiety (HADS-A)	Anxiety	Caregiver Outcomes- Caregiver Reported												HADS-A score presented an increasing trend with time (0 year: 8.3 ± 3.1, 0.5 year: 8.7 ± 3.8, 1 year: 9.2 ± 3.3, 2 years: 9.2 ± 3.5, 3 years: 9.4 ± 3.1) (P < .001). Meanwhile, the anxiety rate was elevated with time (0 year: 45.2%, 0.5 year: 54.8%, 1 year: 56.7%, 2 years: 58.7%, 3 years: 60.6%) (P < .001) (P = .038). Besides, anxiety severity aggravated with time. Multivariate logistic regression…
14	#358 – Piscione 2014	An Examination of Adolescent Bone Tumor Patient Responses on the Activities Scale for Kids (ASK)	Physical & Occupational Therapy In Pediatrics	Canada	English		Longitudinal	Mixed methods	Garron Family Cancer Centre	n=181 (n=154 leg, n=27 arm)											Mean age at T1 was 13 years (range, 7-17 years; SD=2.8)	Male: n=44, Female n=110			Osteosarcoma n=57(61%); Ewing's sarcoma n=28(30%); benign aggressive n=8(9%)	n= 87(94%) received chemotherapy; n=7(7%) received radiation. n=11 still receiving chemotherapy.	Limb salvage: n=58(62%); rotationplasty: n=18(19%); fibular resection: n=8(9%); above-knee amputation n=3(3%); below-knee amputation n=4(4%); hemipelvectomy: n=2(2%)	Lower extremity (n=154). Femur n=49 (53%), Tibia n=28 (30%), Fibula n=9 (10%), Other n=7 (8%).	Mean time since tumor resection was 3 years (range, 0.3-9.4 years; SD = 2.2)		pTESS-Leg Questionnaire	Physical function	Patient Outcomes- Patient Reported			Participants with malignant tumors had greater variability and overall lower summary scores (T1: mean=76, SD=19; T2:mean=80, SD=15) than did those with benign aggressive tumors (T1 mean = 88, SD = 17; T2 mean=82,SD=1); Time off chemotherapy correlated moderately with higher pTESS-Leg scores (r = 0.4; p < 0.001; 95% CI, 0.2-0.5)							The third theme related to parental expectations and imposed restrictions. One 17-year old chose NA but wrote “I don’t have chores because my parents know I can’t do the usual things.” Similarly, a 16-year old provided “not allowed” as a TR to the item pertaining to “carrying a drink or food to the table.” Another 17-year old, 1 month from finishing chemotherapy, chose NA but wrote “doctors will …						Additionally, at the end of the ASK, three participants wrote comments indicating they felt the questions were geared to younger children. All comments came from 14-year old participants. Comments included: “we found this questionnaire geared to younger children,” “I’m 14 – this does not apply” and “I found a lot of these questions geared to smaller children.”
15	#136 – Piscione 2019	The Pediatric Toronto Extremity Salvage Score (pTESS): Validation of a Self-reported Functional Outcomes Tool for Children with Extremity Tumors.	Clinical Orthopaedics & Related Research	Canada	English		Longitudinal	Mixed methods	Garron Family Cancer Centre	n=181 (n=154 leg, n=27 arm)											Mean age at T1 was 13 years (range, 7-17 years; SD=2.8)	Male: n=44, Female n=110			Osteosarcoma n=57(61%); Ewing's sarcoma n=28(30%); benign aggressive n=8(9%)	n= 87(94%) received chemotherapy; n=7(7%) received radiation. n=11 still receiving chemotherapy.	Limb salvage: n=58(62%); rotationplasty: n=18(19%); fibular resection: n=8(9%); above-knee amputation n=3(3%); below-knee amputation n=4(4%); hemipelvectomy: n=2(2%)	Lower extremity (n=154). Femur n=49 (53%), Tibia n=28 (30%), Fibula n=9 (10%), Other n=7 (8%).	Mean time since tumor resection was 3 years (range, 0.3-9.4 years; SD = 2.2)		pTESS-Leg Questionnaire	Physical function	Patient Outcomes- Patient Reported				Participants with malignant tumors had greater variability and overall lower summary scores (T1: mean=76, SD=19; T2:mean=80, SD=15) than did those with benign aggressive tumors (T1 mean = 88, SD = 17; T2 mean=82,SD=1); Time off chemotherapy correlated moderately with higher pTESS-Leg scores (r = 0.4; p < 0.001; 95% CI, 0.2-0.5)
16	#6216 – Sainsbury 2014	Long-term outcomes following lower extremity sarcoma resection and reconstruction with vascularized fibula flaps in children	Journal of the American Society of Plastic Surgeons	Canada	English	not indicated; published 2014	Retrospective observational study	Mixed methods		n = 18, 10/18 participated in the telephone survey											Mean age at resection: 10 yo, range 1.5 - 17 years old				Osteosarcoma n = 9, Ewing's n = 8, adamantinoma n = 1	17/18 recieved chemotherapy prior to surgery	Limb salvage with oncologic defect reconstructions with vascularized fibula flaps at sites of resection: n=19. Sites: Femur n = 10, tibia n = 7, fibular n = 1	Lower extremity n=18 (tibia n=7, femur n=11)	Surgery done between July 1994 and April 2012		Telephone survey incorpating elements of SF-12 Health Survey (for patients >12 years) and PedsQL	HRQoL	Patient Outcomes- Patient and Parent Reported	7/10 had mental and physical scores close to 50, 1/10 scored mental and physical score in the range of 60-70 and one scored greater than 9. One patient scored 29 (physical) and 45 (mental)	One patient reported they had donor-site pain or hypersensitivity; with respect to the actual donor joint or leg, 2/10 reported stiffness or pain, 2/10 reported numbness or tingling, 3/10 reported weakness, 1/10 had pain, 3/10 had stiffness and contracture/deformity, 4/10 had numbness/tingling; with respect to donor-site scar there were no complaints of pain, but one patient reported tiching or t…	Weight-bearing: 9/10 are able to fully-bear weight on the limb where fibula flap was harvested; with respect to recipient limb, 6/10 had full weight bear, 2/10 partial weight bear, 1/10 had no weight bear due to fracture. With respect to the donor-site joint or leg, 3/9 reported knee or ankle joint instability on donor limb, 4/10 reported deformity, 2/10 reported weakness of the great toe on the …	6/10 use a walking aid for mobility Range of Gilette Functional Assessment of Leg Score is 8 (4 patients) and 9 (5 patients), meaning they are able to walk outside the home on uneven and level surfaces, but require assistance for safety or supervision with running and climbing 4/9 patients use a special adaptation at school including taking a taxi in the winter (n = 1) and using elevators instead…	2/10 patients responses they accomplished less as a result of their physical health Partients reported minimal impact on low-demand activities such as bathing or getting dressed (mean, 2.8/3) and lifting or carrying groceries (mean, 2.7 of 3) Patients generally limited somewhat with bending, kneeling or stooping (mean, 1.9/3) Patients reported they were limited during vigorous activities, such as…						8/10 felt their donor site scar was acceptable and 6/10 felt their reciepient-site scar was acceptable	7/10 had mental and physical scores close to 50, 1/10 scored mental and physical score in the range of 60-70 and one scored greater than 9. One patient scored 29 (physical) and 45 (mental)		Nine patients replied that they were satisfied with the outcomes of surgery. The remaining patient replied, “kind-of.”	2/10 patients responses they accomplished less as a result of their physical health Partients reported minimal impact on low-demand activities such as bathing or getting dressed (mean, 2.8/3) and lifting or carrying groceries (mean, 2.7 of 3) Patients generally limited somewhat with bending, kneeling or stooping (mean, 1.9/3) Patients reported they were limited during vigorous activities, such as…
17	#2865 – Smith 1995	Phantom limb pain and chemotherapy in pediatric amputees	Mayo Clinic Proceedings	USA	English	1983-1993	Retrospective review	Quantitative	1995 Mayo Foundation for Medical Education and Research	n=67											Eligible if between 5-17yo at surgery					Completed CHRx or received CHRx at the time of amputation; n=23 Received CHRx after amputation; n=27 Never received CHRx; n=17	Amputation n=67	Following amputations were eligibile: Syme' s, below-knee, through-knee, above-knee, hip disarticulation, hemipelvectomy, below-elbow, elbow disarticulation, above-elbow, or shoulder disarticulatio			Report from patient medical records and physician notes	Phantom limb pain	Patient Outcomes- Patient Reported		n=32 (48%) report phantom limb pain; 74% who were exposed to CHRx before or at the time of amputation, 44% who received CHRx after amputation, and 12% who never recieved CHRx experienced phantom limb pain
18	#9105 – Stevenson 2018	Vascularized fibular epiphyseal transfer for proximal humeral reconstruction in children with a primary sarcoma of bone.	The British Editorial Society of Bone & Joint Surgery	United Kingdom	English		Retrospective review	Quanitative	none to declare	N = 11											Mean age at surgery: 5 years (2-8 yrs)				Ewing's sarcoma n= 6 Osteosarcoma n= 5	Neoadjuvant and adjuvant chemotherapy n=11	Proximal humerus reconstruction n=11	Upper limb n=11 (proximal humerus)			TESS	Functional outcome	Patient Outcome- Patient Reported			Mean TESS = 84% (65% - 94%)
19	#1961 – Tabone 2005	Quality of life of patients treated during childhood for a bone tumor: Assessment by the Child Health Questionnaire	Pediatric Blood Cancer	France	English	July 1998 - 1999	Cross sectional	Quanitative		N = 37						parents					Range: 10 - 18 years at time of study, no age given for diagnosis; Median = 15 years	25 boys, 12 girls	NR	NR	Osteosarcoma: N = 19 (m = 13, f = 6,) Ewing's: N = 18 (m = 12, f = 6)	radiotherapy (n = 7), high-dose chemo and stem cell rescue (n = 6)	Surgery; n=34 -Amputation; n=2 -Endoprosthesis; n=15 -Other; n=17	Primary Site: Long Bone n=25, Other n=12	Median follow-up time from treatment: 4 years (Range: 1.5 - 12 years)	Relapse: Yes n=4, No n=33 Initial Lung Metastasis: Yes n=4, No n=33	Child Health Questionnaire (CHQ)	Overall QoL across demographic data (gender, age at QoL assessment less than 13 vs. 13 years), clinical data (osteosarcoma vs. Ewing sarcoma, long bones vs. other sites, secondary events), treatments (endoprosthesis, amputation, radiotherapy, autologous bone marrow transplantation), follow-up from end of treatment	Patient Outcomes- Patient and Caregiver Reported	Mean score 60; males had better general health (61) than females (58); >13 years of age had better general health (60) than <13 (58); Ewing's (63) > osteosarcoma (57); w/o endoprothesis (56) > w/ endoprothesis (61); No difference between tumor sites: Long bone vs Other (60) -Initial Radiotherapy: No (61) > yes (53) -High dose chemo and stem cell rescue: Yes (64) > (59) -Recurrence: No (61)> Yes (…	Mean QoL score in Bodily pain was 76 for the whole group; by gender, males scored higher (79 vs 68); by age, those <13 scored higher (86 vs 73); Ewing sarcoma patients scored higher (81) than osteosarcoma patients (71); those had endoprothesis reported highr bodily pain (79) vs those who did not (74); Tumor site: Other (80)> Long Bone (74) -Initial Radiotherapy: Yes (84)> No(74) -High dose chemo …	**measured as physical functioning; mean score was 81, males reported better functioning (83) than females (78); those <13 years old (86) had better functioning than >13 (80); Ewing's (86) better fuctioning than osteosarcoma (79); those with endoprothesis had less functioning (76) than without (85); -Tumor Site: Other (87)> Long Bone (78) -Initial Radiotherapy: Yes (83)> No (81) -High dose chemo …			Family activity: Mean = 87; females had more family activity (93) than males (84); both age groups had similar activity (87 and 86); Ewing's had more activity (91) than osteosarcoma (83); with endoprothesis had less family activity (83) than those without (89); -Tumor Site: Other (92)> Long bone (84) -Initial Radiotherapy: Yes (95) > No (85) -High dose chemo and stem cell rescue: No (87)> Yes (84…					Mean score 70; across age and gender had similar scores of 70, with women scoring one point lower (69) in self-esteem; Ewing's had higher self-esteem (73) than osteosarcoma (67); those without endoprosthesis had higher self-esteem (73) than those with (66); -Tumor Site: Other (73)> Long bone (69) -Initial Radiotherapy: Yes (72) > No (70) -High dose chemo and stem cell rescue: Yes (75)> No (69) -R…	Overall mean score= 74 -Gender: Male (77)> Female (68) -Age at Evaluation: Less 13 yrs (76)> Greater 13 yrs (76) -Tumor Type: Ewing Sarcoma (76)> Osteoscarcoma (72) -Tumor Site: Long Bone (74)= Other (74) -Initial Radiotherapy: Yes (77)> No (73) -Endoprothesis: Yes (84)> No (72) -High dose chemo and stem cell rescue: Yes (84)> No (720 -Recurrence: Yes (74)=No (74) -Follow Up: Less 5 yrs (74) = Gr…
20	#4719 – Tacyildiz 2021	Late effects of osteosarcoma and its treatment in pediatric patients: A single-center experience	Journal of Balkan Union of Oncology	Turkey	English		Retrospective, Case-control study	Quantitative		n=39											Mean age at time of study: 17.42±3.15 years Time since diagnosis range= 0-5 years Between 0-5yo since diagnosis: n=22 (56.4%) Between 5-10 years since diagnosis n=12 (30.8%) >10 years sice diagnosis n=5 (12.8%)	Female: n=15; Male: n=24			Osteosarcoma n= 39	Chemotherapy n=39 -Euramos MAP n=16 -Euramos MAPIE n=15 -Other n=8	Amputation n=5 (12.8%) Extremity-sparing surgery n=34 (87.2%)			Renal failure n=2 (5.1%) Cardiotoxicity n=4 (10.3%) Neuropathy n=2 (5.1%) Hearing loss n=2 (5.1%) Psychiatric drug therapy n=2 (5.1%) Psychotherapy n=0 (0%)	Questionnaire (unspecified)	Quality of life	Patient Outcome- Patient Reported	Use of Health Services No or <3 in the last three months n=32 (82%) > or = 3 in the last three months n=1 (2.6%) Hospitalized as an inpatient in the past year n=6 (15.4%) Compared with their siblings (0%), survivors (15.4%) were more likely to have visited an outpatient clinic and/or been hospitalized as an inpatient in the last year (p<0.001)	Pain in last four weeks: No: n=34, 87.2% (vs n=77, 100% in siblings) Mild n=2, 5.1% (vs n=0, 0% in siblings) Severe n=3, 7.7% (vs n=0, 0% in siblings) Survivors reported more bodily pain (12.8 vs. 0%) during the past four weeks compared with the siblings (p=0.02)	Limitation in physical functioning No n=14, 35.9% ( vs. n=76, 98.7% in siblings) Difficulty in routine daily activities n=2, 5.1% (vs. n=1, 1.3% in siblings) Difficulty in walking/extremity movement n=9, 23.1% (vs. n=0, 0% in siblings) Severe difficulty in physical activity n=14, 35.9% (35.9%) (n=0, 0% in siblings) When compared to siblings (1.3%), survivors of osteosarcoma (64.1%) showed signifi…			Having Children Yes n=0, 0% (vs n=23, 29.9% in siblings) No n=39, 100% (vs n=54, 70.1% in siblings) Parenthood data were 29.9% in the siblings and 0% in the survivors (p<0.001). Marital Status Ever married n=2, 5.1% (vs n=25, 32.5% in siblings) Overall, 5.1% of survivors reported having been married compared to 32.5% of siblings (p=0.01). Current Smoker n=1, 2.6% (vs n=7, 9.1% in siblings, diff n…		Employment Yes n=1, 2.6% (vs n=22, 28.6% in siblings) No n=38, 97.4% (vs n=55, 71.4% in siblings) Employment rates were low, and more siblings (28.6 %) worked versus survivors (2.6%) (p<0.001) Education Illiterate n=5, 12.8% (vs n=6, 7.8% in siblings) Student n=26, 66.7% (vs n=34, 44.1% in siblings) Drop out from school n=4, 10.2% (vs n=3, 3.9% in siblings) High school n=3, 7.7% (vs n=26, 33.7% i…
21	#3250 – Tebbi 1989	Adjustment to amputation among adolescent oncology patients	The American Journal of Pediatric Hematology/Oncology	Brazil	English		Cross sectional	Mixed methods	Grant from Association for Research of Childhood Cancer	n=33 (all completed the questionnaires and were interviewed)											Mean age at time of study: 14.4±2.4 yo (range 10-20 at time of interview). Mean age at amputation 12.9±2.7 yo	Female n=17, Male n=16					Amputation n=33	Below the knee n=2 Through the knee n=2 Above the knee n=20 Hips disarticulation n=9	Mean interview time post surgey: 17 months 12 months or less after surgery n=20 Between 1-2 years post surgery n=7 Between 2-3 years after surgery n=2 Between 3-4 years n=4	Living Situation Living with parents n=29 Living with roommate n=4 Education at time of interview Completed elementary school n=21 Junior high school n=5 Senior high school n=6	Interview (yes/no questions and open ended response)	Life adjustments post surgery	Patient Outcome- Patient Reported	Thirty two participants reported some post surgical problem. Elevn respondents focused on disease-related subjects such as pain, chemotherapy side effects, and long hospitaliztion causing extended separation from parents.	All patients experienced phantom limb pain after surgery, 66% continued to do so at time of interview	58% reported that before surgery they understood the limitatations in functioning after undergoing an amputation; 62% said prosthesis allows desired functions; 20.8% has worrries about regaining prior level of physical functioning; 24% has problems with common household chores; 39% had problems with getting around the house and shopping. 17% has problems caring for children	77% felt they were independent in and out of the home; n=15 (45%) needed crutches to obtain that independence. A majority of the patients, 69% were involved with homemaking before surgery, and at the time of interview 64% were still involved. For the most part, patients reported problems with common household chores (24%), becoming isolated (41%), caring for children (17%), and problems with etti…		Before surgery, a third of patients (n=11) reported conferring with their mothers. The next most frequently chosen confident was a sibling (n=5) and then a staff member (n=3) or friend of the same sex (n=5). The majority (84%) of patients said their parents were supportive and helped them cope with their illness. Friends in 50% of cases (n=15) were described as being overly helpful to the point o…	62% said prosthesis was expensive to buy, fix, repair	Ninety percent of patients were in school before surgery and 46% returned to school after surgery. Of those reporting the lnegth of time that passed before returning to school, eight of 12 (67%) were back to school in 12 months or less. Upon returning to school, more than half reported no difficulties. Sixty seven percent could not keep up with the school work. Ninety four percent reported improv…		Tweleve percent had a steady relationship with someone of the opposite sex. Three participants reported the other person becoming closer to the patient and 2 indicated a gradual drifting away by the special friend. More often than not, patients reported the other person as feeling uncomfortable when talking about illness.	6% are disturbed by appearance of prosthesis; 43% said it limits the clothes they can wear			88% (n=29) patients felt they understood the reason for surgery, and a similar percentage (82%) were involved in the preoperative decision making. Restrospectively, only a little more than half (58%) reported that before surgery they understood the limitations in functioning after undergoing an amputation. The majority (60.6%) reported problems to be not as bad as expected, 24.2% as expected, and…
22	#8503 – Tran 2023	Pediatric and Adult Patients Have Similar Functional Improvement After Endoprosthetic Reconstruction of Lower-Extremity Tumors.	Journal of Bone and Joint Surgery	Canada, but study performed in 48 sites in 12 countries	English	2013-2019	Secondary analysis of a multicenter, blinded RCT	Quanitative	Canadian Institutes of Health Research, Canadian Cancer Society Research Institute, Canadian Orthopaedic Foundation, Orthopaedic Research and Education Foundation, Physicians' Services Incorporated	N = 597, 150 pediatric patients											Mean age at study= 15.6yo (SD=1.9)	Male = 98 Female = 52			Primary bone sarcoma (n = 146), soft-tissue sarcoma (n = 1), giant cell tumor (n = 3)	Pre-operative chemotherapy n = 129 Adjuvant Chemotherapy n = 140 Adjuvant radiation therapy n = 8	Endoprosthetic reconstruction n=150	Lower extremity: Tibia n=33 Femur= 117		Average length of hospital stay: 5 days (4-7 days) Needed reoperations n=85	TESS	Managing in performing activities of daily living	Patient Outcomes- Patient Reported				Baseline score: 73.4 ± 22.3 3 months post-op: 73.7 ± 19.8 6 months post-op: 81.5 ± 16.2 1 year post-op: 87.7 ± 14.7 Difference from baseline to 1 year post-op: 14.1 ± 24.3												Pediatric patients experienced superior self-reported and clinically evaluated functional outcomes at baseline throughout recovery following limg salvage surgery compared to adult patients MSTS Clinican Reported but is as follows Baseline= 64.7 ± 23.2 3 months post op= 64.7 ± 23.2 6 months post op= 74.4 ± 22.2 1 year post op= 82.0 ± 20.2 Difference from baseline to 1yr postop=17.4 ± 31.0
23	#1978 – Tunn 2004	Osteosarcoma in Children: Long-Term Functional Analysis	Clinic Orthopaedics and Related Research	Germany	English		Cross sectional	Quanitative		n=78											Median age at study: 13 years (Range: 6-15)				Osteosarcoma n=78. (Osteoblastic n=47, Chrondroblastic n=21, Telangiectatic n=6, fibroblastic n=4).		Amputation n=44 (56%) -Transfemoral amputation n=25 -Disarticulation of the hip n=7 -Disarticulation of the knee n=5 -Disarticulation of the shoulder n=3 -Hemipelvectomy n=4 Limb salvage surgery n=29 (37%) -Endoprosthesis Distal femur n=12 -Proximal tibia n=8 -Proximal femur n=3 -Total femur n=2 -Resection alone n=4 Rotationplasty n=5 (7%)	Lower extremities distal femur (n = 35, 44.9%), proximal tibia (n = 24, 30.7%), proximal femur (n = 8, 10.2%), proximal fibula (n = 6, 7.7%), proximal humerus (n = 3, 3.8%), diaphysis of the femur (n = 1, 1.3%), pelvis (n = 1 , 1.3%)			Toronto Extremity Salvage Score (TESS-LE) (German Translation)	Physical Disability	Patient Outcomes- Patient Reported			Median=77% (Range: 42-93%)					All children who survived free from disease graduated from school and started job training. Of 13 patients who were evaluated with the Toronto Extremity Salvage Score, six were used full-time, five were students, one was unemployed, and one was unable to work.
24	#4443 – Vasquez 2022	Quality of Life and Limb Functionality in Adolescents and Young Adults Surviving Bone Tumors in the Lower Extremity in a Developing Country: A Cross-Sectional Study	Bone Cancer Survivors	Peru	English		Cross sectional	Quanitative		n=19											Age at diagnosis Conservative Surgery: Mean=15yo (Range: 11-17) Amputation: Mean=15yo (Range: 13-15) Current Age Conservative Surgery: Mean=20yo (Range: 14-25) Amputation: Mean=21.5 (Range=16-27)	Female: Total n=11 Conservative Surgery n=8 Amputation n=3 Male: Total n=8 Conservative Surgery n=7 Amputation n=1			Osteosarcoma Total n=17 Conservative surgery n=13 Amputation n=4 Ewings Sarcoma Total n=2 Conservative surgery n=2 Amputation n=0		Conservative surgery n=15, Amputation n=4	Tumor Location Distal Femur n=11 (Conservative surgery n=8, Amputation n=3) Proximal Femur n=3 (Conservative surgery n=2, Amputation n=1) Proximal Tibia n=4 (Conservative surgery n=4, Amputation n=0) Fibula n=1 (Conservative surgery n=1, Amputation n=0)		Stage: Localized n=16 (Conservative surgery n=14, Amputation n=2) Metastatic n=3 (Conservative surgery n=1, Amputation n=2) Postsurgical Complications Yes: n=5 (Conservative surgery n=5, Amputation n=0) No: n=14 (Conservative surgery n=10, Amputation n=4) Enneking: Conservative surgery: Mean=78 (SD=14.6, Range: 53.5.-100). Amputation: Mean=59.1 (SD=18.3, Range: 50-86.6)	Medical Outcomes SF-36 Health Survey and Enneking score (MSTS)	Functionality and QoL	Patient Outcomes- Patient Reported	General Health Male: Mean=83.4 (SD=6.3, Range, 72.92) Female: Mean=75.5 (SD-6.6, Range=68-88). QoL among patients who had conservative surgery was not significantly better tham amputee patients in either the physical or mental aspects, not in any of their components	Pain Male: Mean= 70.1 (SD=12.5, Range=45.5-81.8) Female: Mean=73.9 (SD=18.5, Range= 45.5-90.9)	Physical Functioning Male: Mean=79.5 (SD=9.7, Range= 66.7-90) Female: Mean=81.3 (SD=11.8, Range= 66.7-96.7). Limb functionality, accoridng to Enneking's staging, was significantly higher in non-amputees	Role Physical Male: Mean=80.4 (SD=15.9, Range=62.5-100) Female: Mean=85.9 (SD=12.4, Range=62.5-100)		Male: Mean=82.9 (SD=17, Range= 50-100) Female: Mean=67.5 (SD=12.8, Range=50-80) Among nonamputees, social functioning (p= 0.014) and overall health perception (p =0.026) were better among men.						Male: Mean=81.4 (SD=11, Range: 66.7-100) Female: Mean=76.7 (SD=10.4, Range: 66.7-96.7) QoL among patients who had conservative surgery was not significantly better than amputee patients in either the physical or mental aspects, nor in any of their components.			Social functioning and overall health perception were better among men in the group of patients who had conservative surgery	Social functioning and overall health perception were better among men in the group of patients who had conservative surgery Role Emotional Male: Mean=90.5 (SD=13.1, Range=66.7-100) Female: Mean=87.5 (SD=23.1, Range=50-100) Vitality Male: Mean=72 (SD=13.8, Range= 58.3-100) Female: Mean=66.1 (SD=7.9, Range=54.2-75) Physical Component Summary Conservative Surgery: Mean=79.1 (SD=7.4, Range=64.8-93.2…
25	#488 – Tirado 2011	Quality of life and functionality in pediatric patients operated on for lower limb bone tumors: limb salvage surgery versus amputation.	Rehabilitación	Spain	Spanish		Cross sectional	Quanitative		n=17											Mean age at diagnosis= 11.12 yrs, Mean current age= 22.8 yrs	Female n=9, Male n=8			Osteosarcoma n=13, Ewings Sarcoma n=4	Chemotherapy n=17, Radiotherapy n=1	Block resection followed by endoprosthesis n=8, Block resection with grafting and osteosynthesis n=4, Amputation at Initial Surgery n=5, Amputation performed at a later stage after attempt at reconstruction n=5	Location: lower extremities Proximal third of femur n=1 (5.9%) Middle third of femur n=1 (5.9%) Distal third of femur n=7 (41.2%) Proximal third of tibia n=5 (29.4%) Middle third of tibia n=0 (0.0%) Distal third of tibia n=3 (17.6%)		Complications Osteosynthesis material breakage n=5 (29%) Infection n=3 (17.6%) Endoprosthesis mobilization n=5 (29%) Tumor recurrence n=4 (23.5%) Limb shortening n=4 (23.5%) Required reintervention n=11 (65%) Metastasis at diagnosis n=0 (0.0%)	36-Item Short Form Survey (SF-36)	Quality of Life	Patient Outcomes- Patient Reported	Reconstruction: Mean=87 (67-92), Amputation: Mean=82 (68.25-88.25)	Reconstruction: Mean=62 (51-72), Amputation: Mean=85 (59.5-100)	Reconstruction: Mean=85 (60-95), Amputation: Mean=90 (50-95)	Reconstruction: Mean=100 (75-100), Amputation: Mean=100 (93.75-100)		Reconstruction: Mean=100 (87.5-100), Amputation: Mean=100 (96.87-100)						Reconstruction: Mean=80 (68-84), Amputation: Mean=78 (74-94)				Vitality. Reconstruction: Mean=70 (60-80), Amputation: Mean=67.5 (56.25-80). Emotional Role. Reconstruction: Mean=100 (66.66-100), Amputation: Mean=100 (66.66-100)
26	#196 – Wang 2018	Gabapentin as an Adjuvant Therapy for Prevention of Acute Phantom-Limb Pain in Pediatric Patients Undergoing Amputation for Malignant Bone Tumors: A Prospective Double-Blind Randomized Controlled Trial.	Journal of Pain and Symptom Management	China	English	May 2013 - March 2016	Prospective double-blind RCT	Quantitative	Sichuan Cancer Hospital Innovative Research Grant	N = 45											Age range at surgery: Gabapentin: 10 - 16 yrs (mean: 14.3 +/- 2.8) Placebo: 11 - 17 yrs (mean: 13.9 +/- 2.7)	Gabapentin Male = 12 Female = 11 Placebo Male = 11 Female = 11			Osteosarcoma Gabapentin = 21 (91.3%) Placebo = 20 (87.0) Ewing's sarcoma Gabapentin = 2 (8.7) Placebo = 2 (13.0)	Once the diagnosis was confirmed, nonadjuvant chemotherapy was initated to maximize the limb-saving surgery rate. If the tumor failed to respond to the chemotherapy, the decision of amputation surgery would be made with informed consent from parents and guardians.	Amputation (n = 45)	Above knee Gabapentin: n = 16 Placebo: n = 14 Below knee Gabapentin: n = 7 Placebo: n = 8	Time points were taken day of hospitalization (DOH), day of randomization (DOR), day of surgery (DOS), and 7, 14, 30 and 60 days post-op		Visual analog scale	Pain intensity of phantom limb pain (PLP)	Patient-outcomes - patient reported		In all the post-op time points (7, 14, 30 and 60 days post-op), the patients in the gabapentin group had a significantly lower rate of PLP than the patients in the placebo group (P < 0.05). At the last follow-up of 60 days after amputation, the rate of PLP was 43.84% in gabapentin group versus 77.27% in placebo group (P = 0.033). There was no significant difference in pain intensity between the t…														No severe adverse effect was observed in both groups, except that two boys with above-knee amputation in placebo group complained of a tingling sensation in the phantom-limb, occurring 10 days after amputation in one patient, and 15 days after amputation in the other, both were triggered by urination in a standing position. They reported that the tingling sensation started from the stump area and…
27	#524 – Weir 2010	Effects of paediatric limb loss on healthcare utilisation, schooling and parental labour supply.	Disability and Rehabilitation	USA	English	April to September 2002	Cross-sectional, retrospective pilot survey	Quanitative		Total is 123 children, but sample size for cancer is n = 28					Health insurance: Any coverage: 100% % Private insurance only: 78.6% **"any coverage" is the combined statistic for usage of public and/or private insurance	88.6% were mothers, 9.8% were fathers and 1.6% were other relatives of children with limb loss.	Marital status: Spouse/partner: 96.4% Unattached: 3.6%			Mother's education: (<) High school: 14.3% (>) Some college: 85.3%	Age range for inclusion in survey was between 1 - 18 years of age	Male = 57.1% Female = 42.9%		White, non-Hispanic: 96.4% Non-White/Hispanic: 3.6%	n/a	n/a	Amputation	n/a	time since surgery (%):	92.9% use prosthesis	Limb Loss Parent Survey	Costs experienced by the families, specifically healthcare utilisation, schooling and parental labour supply	Caregiver and patient outcomes- Caregiver Reported							Prosthesis insurance coverage: All costs covered (%) = 52% Some costs covered (%) - 44% No costs covered (%) = 4% Limits on coverage (%) = 50% Claim ever denied(%) = 26.9% Ever paid out-of-pocket (%) = 38.5% Mean out-of-pocket paid in the past year: $1329, SD $1639	Children with a cancer-related amputation had nearly four more days off for reasons not associated with limb loss, mean = 7.9 days, SD 12.5 than did other children Limb-loss related days = 2.6, SD 3.6 Combined missed days = 10.6, SD 12.4 3.6% of children were currently not enrolled in school								The odds of hospitalization were four times higher for children with malignant amputation than for other children 35.7% experienced (>) 1 hospital stay, with mean stay times of 3.3 days per child, SD 10.2 and mean total nights being 51.2 days, SD 82.8 25% experienced (>) 1 ED visit, average visits per child 0.4 (SD 0.7) (>) PT/OT visit = 39.3% Mean PT/OT visits per child 6.5, SD 13.1 Mean time pe…
